# Supplementary material for: Exogenous SA Applications Alleviate Salinity Stress via Physiological and Biochemical changes in St John’s Wort Plants
Source: MDPI journal article supplement (doi:10.3390/plants12020310), 2023-01-09
Supplement: s1 [file s1]

# Exogenous SA applications alleviate salinity stress via physiologic and biochemical regulation in St John's wort plants

Eun-Hae Kwon<sup>1</sup>, Arjun Adhikari <sup>1</sup>, Muhammad Imran<sup>1</sup>, Da-Sol Lee<sup>1</sup>, Chung-Yeol Lee<sup>2</sup>, Sang-Mo Kang <sup>1</sup> and In-Jung Lee <sup>1,\*</sup>

Table S1: Details of genes; name, description and oligonucleotide sequences used for qRT-PCR.

| Gene Name | Description                                 | Primer Sequence (5' to 3')                        |
|-----------|---------------------------------------------|---------------------------------------------------|
| TDC       | Tryptophan decarboxylase                    | L:GGCTCGGATGGGTCATCGTG<br>R:TCCGCAGCAGTCGTGGTAAC  |
| T5H       | Tryptamine 5-hydroxylase                    | L:CCTTCCTTGGCCGGAACCTC<br>R:TCTCGACGAGGAGGAGAGGGA |
| SNAT      | Serotonin <i>N</i> -acetyltransferase       | L:TAGACTCCGAGGCCGTCACC<br>R:TAGACTCCGAGGCCGTCACC  |
| ASMT      | <i>N</i> -acetylserotonin methyltransferase | L:GGTGACTCGTGGTGGCGAAA<br>R:AGGCTCCTCTCCCAACTGCT  |
